# Supplementary material for: Antibiotic Prescribing in Dutch Daytime and Out-of-Hours General Practice during the COVID-19 Pandemic: A Retrospective Database Study
Source: MDPI journal article supplement (doi:10.3390/antibiotics11030309), 2022-02-25
Supplement: s1 [file s1]

## Supplementary Materials

**Table S1.** Changes in antibiotics prescribing (total, RTIs and UTIs) between the different phases of the COVID-19 pandemic in daytime general practice and out-of-hours services, outcomes of an interrupted time series analyses.

[illegible]

|                        |         |                 |       |        |               |       |
|------------------------|---------|-----------------|-------|--------|---------------|-------|
| Intercept              | 106.528 | 103.465,109.592 | 0.000 | 9.918  | 8.972,10.865  | 0.000 |
| Intercept (phase 0)    | 0.432   | 0.328,0.535     | 0.000 | 0.019  | -0.016,0.054  | 0.287 |
| Intercept (phase 1)    | -15.069 | -20.384,-9.754  | 0.000 | -2.019 | -3.761,-0.278 | 0.023 |
| Intercept (phase 2)    | -0.677  | -12.175,10.821  | 0.908 | -3.779 | -6.499,-1.059 | 0.006 |
| Intercept (phase 3)    | -9.645  | -23.473,4.183   | 0.172 | -5.255 | -8.374,-2.137 | 0.001 |
| Intercept (phase 4)    | -9.208  | -24.784,6.368   | 0.247 | -2.122 | -6.131,1.887  | 0.300 |
| Slope change phase 0-1 | -1.202  | -1.767,-0.636   | 0.000 | 0.206  | 0.051,0.360   | 0.009 |
| Slope change phase 1-2 | 2.075   | 1.459,2.691     | 0.000 | -0.215 | -0.401,-0.029 | 0.023 |
| Slope change phase 2-3 | -2.282  | -2.750,-1.813   | 0.000 | -0.034 | -0.146,0.078  | 0.554 |
| Slope change phase 3-4 | 2.562   | 2.116,3.007     | 0.000 | -0.324 | -0.858,0.209  | 0.233 |

Abbreviations: CI= confidence interval; DGP=daytime general practice; OOH-services=out-of-hours services; RTI=respiratory tract infection; UTI=urinary tract infection.

**Table S2.** The level of antibiotic prescribing in the second intermediate phase (phase 4) of the COVID-19 pandemic in 2021 compared with the same period in 2019, for daytime general practice and out-of-hours services.

|                                                       | DGP     |                   |         | OOH-services |                 |         |
|-------------------------------------------------------|---------|-------------------|---------|--------------|-----------------|---------|
|                                                       | Mean    | 95% CI            | P-value | Mean         | 95% CI          | P-value |
| <b>Overall incidence of antibiotic prescriptions</b>  |         |                   |         |              |                 |         |
| 2019 (same period as phase 4)                         | 560.031 | 554.287 - 565.776 | <0.001  | 39.184       | 34.021 - 44.346 | 0.314   |
| 2021 (phase 4)                                        | 510.815 | 494.751 - 526.880 |         | 36.610       | 34.164 - 39.056 |         |
| <b>Incidence of antibiotic prescriptions for RTIs</b> |         |                   |         |              |                 |         |
| 2019 (same period as phase 4)                         | 48.092  | 43.234 - 52.950   | <0.001  | 3.998        | 3.205 - 4.790   | 0.004   |
| 2021 (phase 4)                                        | 32.100  | 29.411 - 34.789   |         | 2.747        | 2.462 - 3.031   |         |
| <b>Incidence of antibiotic prescriptions for UTIs</b> |         |                   |         |              |                 |         |
| 2019 (same period as phase 4)                         | 120.727 | 116.283 - 125.171 | 0.151   | 10.694       | 9.426 - 11.962  | 0.794   |
| 2021 (phase 4)                                        | 125.596 | 120.342 - 130.850 |         | 10.871       | 9.999 - 11.743  |         |

Abbreviations: CI=confidence interval; DGP=daytime general practice; OOH-services=out-of-hours services; RTI=respiratory tract infection; UTI=urinary tract infection.
